# Supplementary material for: A stretched polar vortex increased mid-latitude climate variability during the Last Glacial Maximum
Source: Copernicus journal article supplement (doi:10.5194/cp-21-67-2025), 2025-01-13
Supplement: Supplementary file 1 [file cp-21-67-2025-supplement.zip]

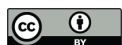

*Supplement of*

**A stretched polar vortex increased mid-latitude climate variability during the Last Glacial Maximum**

**Yurui Zhang et al.**

*Correspondence to:* Yurui Zhang (yuruizhang@xmu.edu.cn)

- cp-21-67-2025-supplement-title-page.pdf
- Supplement.docx

The copyright of individual parts of the supplement might differ from the article licence.
